# Supplementary material for: ALDH2 protects against stroke by clearing 4-HNE
Source: PubMed Central journal article supplement — Cell Res. 2013 May 21;23(7):915–30. doi: 10.1038/cr.2013.69 (PMC3698638; doi:10.1038/cr.2013.69), 2013-05-21
Supplement: cr201369x1.pdf [file cr201369x1.pdf]

## Supplementary information, Table S1

**Table S1** Sociodemographic and health care characteristics of ischemic stroke patients at different stages and control subjects.

| Variables                            | Control    | stage I    | Stage II    | Stage III  | P-value |
|--------------------------------------|------------|------------|-------------|------------|---------|
| Number of Participants               | 30         | 23         | 15          | 13         |         |
| Male (%)                             | 73.3       | 73.9       | 73.3        | 76.9       | 0.9955  |
| Age (years)                          | 68.6±6.6   | 68.0±10.6  | 68.3±6.1    | 70.5±10.3  | 0.8614  |
| Hypertension (%)                     | 50.0       | 52.2       | 40.0        | 69.2       | 0.4884  |
| Systolic BP (mmHg)                   | 130.6±18.8 | 144.2±16.5 | 153.4±24.2* | 132.3±8.0  | 0.0336  |
| Diastolic BP (mmHg)                  | 79.9±9.6   | 80.8±7.1   | 86.4±6.9    | 75.4±5.1   | 0.1894  |
| HR                                   | 77.1±9.8   | 69.4±9.7   | 80.6±9.8    | 77.8±5.2   | 0.2492  |
| Diabetes (%)                         | 23.3       | 8.7        | 33.3        | 30.8       | 0.2951  |
| fasting plasma glucose (mmol/L)      | 5.9±1.1    | 6.0±0.9    | 7.5±2.0     | 5.9±1.0    | 0.2516  |
| Total cholesterol (nmol/L)           | 4.9±0.6    | 4.9±0.6    | 5.2±0.6     | 3.9±0.6*   | 0.0029  |
| Triglyceride (mmol/L)                | 1.8±0.7    | 1.8±1.0    | 1.8±0.6     | 1.4±0.6    | 0.6703  |
| HDL (mmol/L)                         | 1.3±0.2    | 1.3±0.2    | 1.0±0.2     | 1.2±0.3    | 0.1248  |
| History of myocardial infarction (%) | 6.7        | 4.4        | 0.0         | 0.0        | 0.6107  |
| Current smoking (%)                  | 36.7       | 17.4       | 13.3        | 46.2       | 0.1119  |
| Current drinking (%)                 | 23.3       | 13.2       | 13.3        | 30.8       | 0.5216  |
| ALT (U/L)                            | 18.4±4.6   | 19.5±7.7   | 32.6±17.0   | 27.8±19.9  | 0.0724  |
| BUN (mmol/L)                         | 6.6±1.4    | 5.4±1.2    | 6.0±1.6     | 5.6±1.7    | 0.1318  |
| Creatinine (umol/L)                  | 85.0±10.6  | 68.8±15.4* | 73.5±18.2   | 70.3±11.5* | 0.006   |
| uric acid (umol/L)                   | 297±51.3   | 306±57.1   | 339±150     | 322±58.0   | 0.6593  |

Stage I, within 3 days after onset of ischemic stroke; stage II, 7-14 days after onset of ischemic stroke; stage III, 6 months after ischemic stroke; BP, blood pressure; HR, heart ratio; HDL, high-density lipoprotein; ALT, alanine transaminase; BUN, blood urea nitrogen. Data were analyzed by ANOVA followed by Dunnett *post-hoc* testing for continuous variables and chi-square statistics for categorical variables. \* $P < 0.05$ .
