# Supplementary material for: ALDH2 protects against stroke by clearing 4-HNE
Source: PubMed Central journal article supplement — Cell Res. 2013 May 21;23(7):915–30. doi: 10.1038/cr.2013.69 (PMC3698638; doi:10.1038/cr.2013.69), 2013-05-21
Supplement: cr201369x2.pdf [file cr201369x2.pdf]

## Supplementary information, Table S2

**Table S2** Sociodemographic and health care characteristics of 1242 participants and their randomly selected subjects.

| Variables                             | 1242 Participants with follow-up | randomly selected subjects from 1242 participants | <i>P</i> -value |
|---------------------------------------|----------------------------------|---------------------------------------------------|-----------------|
| Number of Participants                | 1242                             | 45                                                |                 |
| Male (%)                              | 47.9                             | 60.0                                              | 0.1108          |
| Age (years)                           | 58.4±9.4                         | 62.3±6.2                                          | 0.0001          |
| BMI (kg/m <sup>2</sup> )              | 25.2±3.4                         | 26.0±3.5                                          | 0.1323          |
| Hypertension (%)                      | 43.2                             | 48.9                                              | 0.4459          |
| Systolic BP (mmHg)                    | 124±17.8                         | 131±18.7                                          | 0.0158          |
| Diastolic BP (mmHg)                   | 76.8±10.2                        | 77.7±10.0                                         | 0.5491          |
| Diabetes (%)                          | 25.6                             | 22.2                                              | 0.6091          |
| History of cardiovascular disease (%) | 15.6                             | 8.9                                               | 0.2189          |
| Current smoking (%)                   | 24.1                             | 26.7                                              | 0.6898          |

BMI, body mass index; BP, blood pressure; Data were analyzed by Student's *t* test for continuous variables and chi-square statistics for categorical variables.
