# Supplementary material for: ALDH2 protects against stroke by clearing 4-HNE
Source: PubMed Central journal article supplement — Cell Res. 2013 May 21;23(7):915–30. doi: 10.1038/cr.2013.69 (PMC3698638; doi:10.1038/cr.2013.69), 2013-05-21
Supplement: cr201369x3.pdf [file cr201369x3.pdf]

## Supplementary information, Table S3

**Table S3** Sociodemographic and health care characteristics of population before follow-up.

| Variables                            | Participants without stroke in follow up | Participants with stroke in follow up | <i>P</i> -value |
|--------------------------------------|------------------------------------------|---------------------------------------|-----------------|
| Number of Participants               | 45                                       | 21                                    |                 |
| Male (%)                             | 60.0                                     | 61.9                                  | 0.8827          |
| Age (years)                          | 62.3±6.2                                 | 60.5±7.1                              | 0.4023          |
| BMI (kg/m <sup>2</sup> )             | 26.0±3.5                                 | 25.3±2.5                              | 0.5526          |
| Hypertension (%)                     | 48.9                                     | 57.1                                  | 0.5320          |
| Systolic BP (mmHg)                   | 131±18.7                                 | 132±12.1                              | 0.8945          |
| Diastolic BP (mmHg)                  | 77.7±10.0                                | 80.8±10.0                             | 0.3200          |
| HR                                   | 77.0±8.9                                 | 79.6±8.0                              | 0.3827          |
| Diabetes (%)                         | 22.2                                     | 23.8                                  | 0.8860          |
| fasting plasma glucose (mmol/L)      | 5.9±1.1                                  | 6.0±1.3                               | 0.8645          |
| Total cholesterol (nmol/L)           | 5.1±0.8                                  | 5.2±0.6                               | 0.5270          |
| Triglyceride (mmol/L)                | 1.7±0.6                                  | 1.8±0.8                               | 0.4977          |
| HDL (mmol/L)                         | 1.4±0.2                                  | 1.4±0.2                               | 0.7439          |
| History of myocardial infarction (%) | 6.7                                      | 4.8                                   | 0.7626          |
| ALT (U/L)                            | 17.1±4.5                                 | 22.6±6.3                              | 0.0012          |
| BUN (mmol/L)                         | 6.4±1.4                                  | 5.6±0.9                               | 0.1016          |
| Creatinine (umol/L)                  | 83.2±10.5                                | 70.8±10.6                             | 0.0006          |
| uric acid (umol/L)                   | 281±54.4                                 | 282±53.9                              | 0.9250          |

BMI, body mass index; BP, blood pressure; HR, heart rate; HDL, high-density lipoprotein; ALT, alanine transaminase; BUN, blood urea nitrogen. Data were analyzed by Student's *t* test for continuous variables and chi-square statistics for categorical variables.
