# Supplementary material for: ALDH2 protects against stroke by clearing 4-HNE
Source: PubMed Central journal article supplement — Cell Res. 2013 May 21;23(7):915–30. doi: 10.1038/cr.2013.69 (PMC3698638; doi:10.1038/cr.2013.69), 2013-05-21
Supplement: cr201369x4.pdf [file cr201369x4.pdf]

## Supplementary information, Figure S1

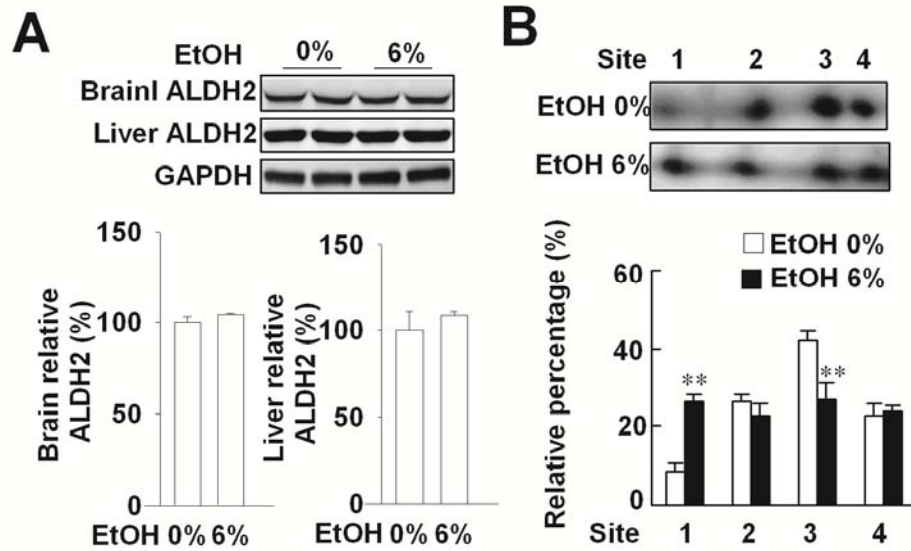

**Figure S1** Ethanol affects the activity of ALDH2. **(A)** Ethanol treatment did not change ALDH2 expression in brain and liver. **(B)** Ethanol treatment shifted isoelectric point distribution of cerebral ALDH2, as detected by two dimensional IEF/SDS gel electrophoresis and western blotting.  $n = 3$ . \* $P < 0.05$ , \*\* $P < 0.01$  vs ethanol 0%. EtOH, ethanol.
