# Supplementary material for: ALDH2 protects against stroke by clearing 4-HNE
Source: PubMed Central journal article supplement — Cell Res. 2013 May 21;23(7):915–30. doi: 10.1038/cr.2013.69 (PMC3698638; doi:10.1038/cr.2013.69), 2013-05-21
Supplement: cr201369x5.pdf [file cr201369x5.pdf]

## Supplementary information, Figure S2

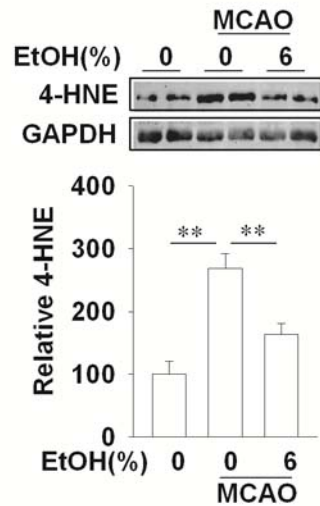

**Figure S2** Ethanol treatment attenuates MCAO-induced rise of 4-HNE. Western blotting shows the expression of 4-HNE in the ischemic penumbra of rats with or without MCAO for 2 h. The animals were pre-treated with 6% ethanol or vehicle for 6 weeks before MCAO. Mean  $\pm$  SD. Data were analyzed by ANOVA followed by LSD *post-hoc* testing. \* $P < 0.05$ , \*\* $P < 0.01$ ,  $n = 3$ . EtOH, ethanol.
