# Supplementary material for: ALDH2 protects against stroke by clearing 4-HNE
Source: PubMed Central journal article supplement — Cell Res. 2013 May 21;23(7):915–30. doi: 10.1038/cr.2013.69 (PMC3698638; doi:10.1038/cr.2013.69), 2013-05-21
Supplement: cr201369x6.pdf [file cr201369x6.pdf]

## Supplementary information, Figure S3

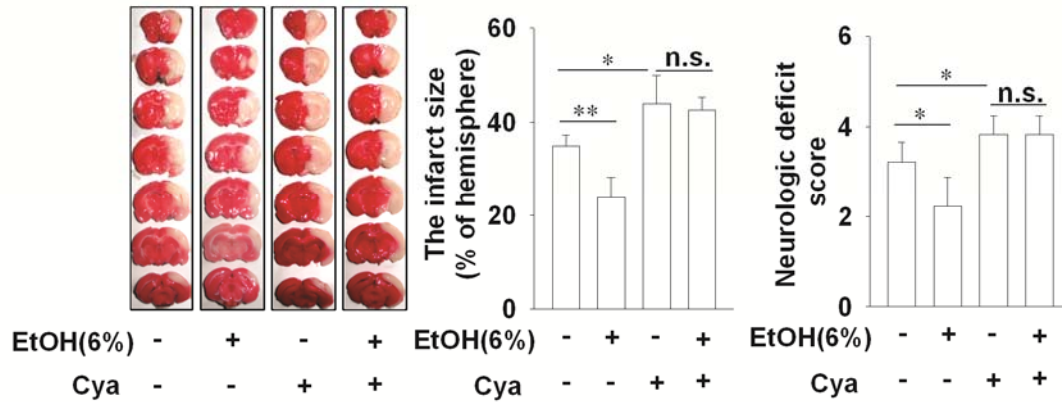

**Figure S3** The protective effect of ethanol on ischemic stroke is mediated by ALDH2 in rats with MCAO. The left panel showing representative TTC staining of 7 corresponding coronal brain sections of vehicle (5  $\mu$ l, i.c.v) and Cya (1 mg in 5 $\mu$ l, i.c.v) treatment rats on day 1 after MCAO for 2 h. The right panel shows the neurologic score. The animals were pre-treated with 6% ethanol for 6 weeks before MCAO. Mean  $\pm$  SD. Data were analyzed by ANOVA followed by LSD *post-hoc* testing. \* $P < 0.05$ , \*\* $P < 0.01$ , n.s. not significant. EtOH, ethanol.
