# Supplementary material for: ALDH2 protects against stroke by clearing 4-HNE
Source: PubMed Central journal article supplement — Cell Res. 2013 May 21;23(7):915–30. doi: 10.1038/cr.2013.69 (PMC3698638; doi:10.1038/cr.2013.69), 2013-05-21
Supplement: cr201369x7.pdf [file cr201369x7.pdf]

## Supplementary information, Figure S4

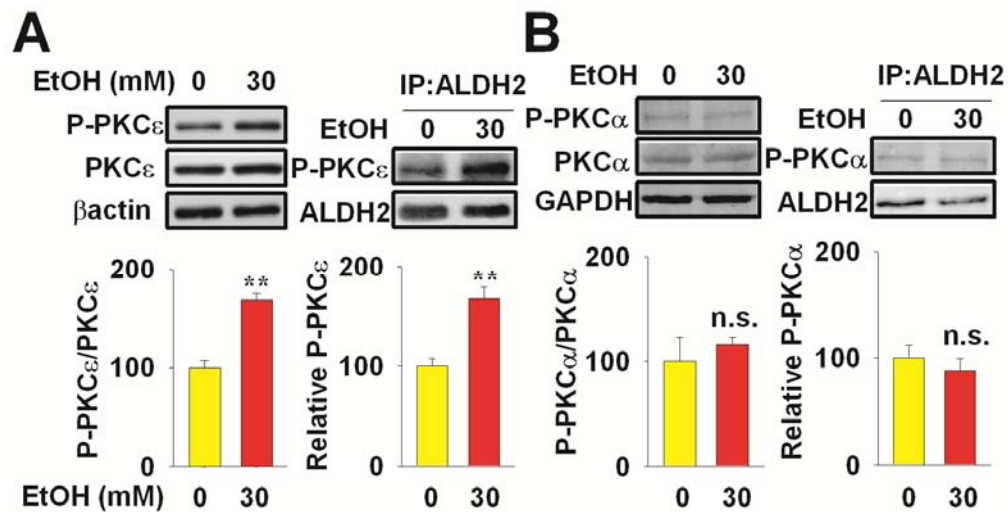

**Figure S4** Ethanol increases the binding of PKC $\epsilon$  to ALDH2. Western blotting and immunoprecipitation (IP) showing: (A) The PKC $\epsilon$  phosphorylation (P-PKC $\epsilon$ ) and the binding of PKC $\epsilon$  to ALDH2. (B) Phosphorylation of PKC $\alpha$  and the binding of PKC $\alpha$  to ALDH2.  $n = 3$ . Mean  $\pm$  SD. Data were analyzed by Student's  $t$  test. \*\* $P < 0.01$ , n.s., not significant.
