# Supplementary material for: ALDH2 protects against stroke by clearing 4-HNE
Source: PubMed Central journal article supplement — Cell Res. 2013 May 21;23(7):915–30. doi: 10.1038/cr.2013.69 (PMC3698638; doi:10.1038/cr.2013.69), 2013-05-21
Supplement: cr201369x8.pdf [file cr201369x8.pdf]

## Supplementary information, Figure S5

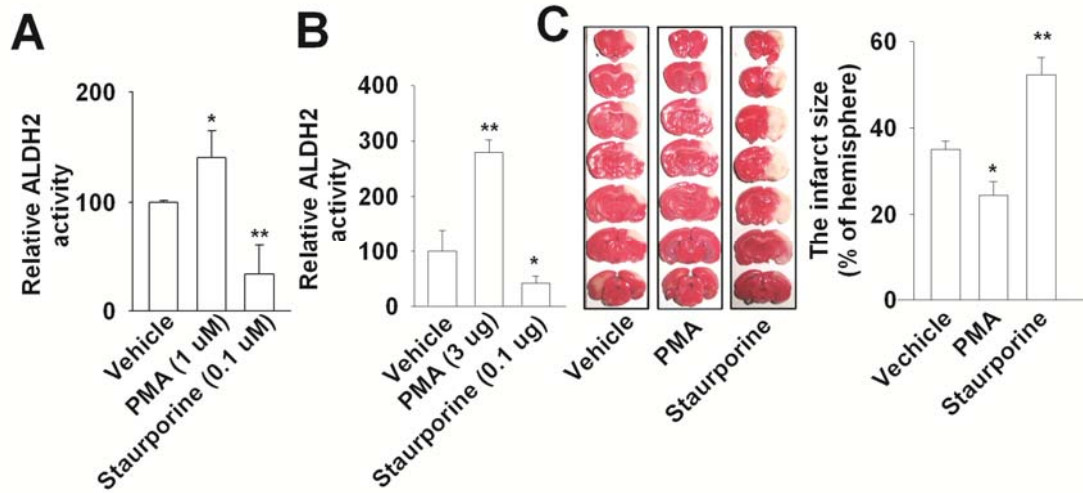

**Figure S5** The activation of PKC $\epsilon$  protects against ischemic injuries *in vivo* and *in vitro*. **(A)** Cultured PC12 cells were treated with vehicle (DMSO), PMA (1  $\mu\text{M}$ ) and staurosporine (0.1  $\mu\text{M}$ ) for 6 h. Then the ALDH2 activity was measured by using clinical chemistry analyzer.  $n = 3$ . **(B)** In SD rats, the effect of intracerebroventricular (i.c.v) injection (5  $\mu\text{l}$ ) of PMA and staurosporine on the activity of ALDH2.  $n = 8$ . **(C)** The left panel shows representative TTC staining of 7 corresponding coronal brain sections of vehicle, PMA and staurosporine treatment rats on day 1 after MCAO for 2 h. The ischemic infarct region is white.  $n = 6$ . Mean  $\pm$  SD. Data are analyzed by ANOVA followed by LSD *post-hoc* testing. \* $P < 0.05$ , \*\* $P < 0.01$  vs. vehicle. PMA, phorbol 12-myristate 13-acetate; MCAO, middle cerebral artery occlusion.
