# Supplementary material for: ALDH2 protects against stroke by clearing 4-HNE
Source: PubMed Central journal article supplement — Cell Res. 2013 May 21;23(7):915–30. doi: 10.1038/cr.2013.69 (PMC3698638; doi:10.1038/cr.2013.69), 2013-05-21
Supplement: cr201369x9.pdf [file cr201369x9.pdf]

## Supplementary information, Figure S6

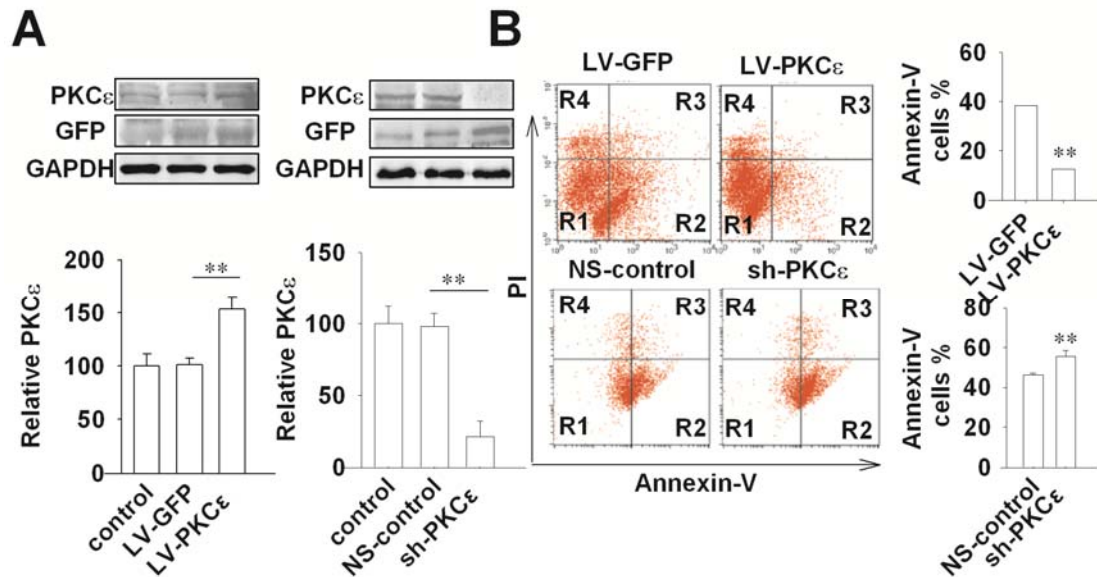

**Figure S6** Overexpression of PKC $\epsilon$  confers neuroprotective effect in cultured neurons.

(A) Immunoblots and quantification showing efficient overexpression of PKC $\epsilon$  by LV-PKC $\epsilon$  and knockdown by sh-PKC $\epsilon$  in cultured neurons. (B) Primary neurons transfected with LV-PKC $\epsilon$  or sh-PKC $\epsilon$ , and their control (LV-GFP or NS-control), were exposed to OGD for 12 h. The cell apoptosis (Annexin V staining, R2 + R3) and necrosis (PI staining, R3 + R4) were analyzed by flow cytometer.  $n = 3$ . Data in A were analyzed by ANOVA followed by LSD *post-hoc* testing; (B) by Student's *t* test. \* $P < 0.05$ , \*\* $P < 0.01$ . PI, propidium iodide; LV-GFP, lentiviral delivery system encoding green fluorescent protein; LV-PKC $\epsilon$ , lentiviral delivery system encoding PKC $\epsilon$ ; sh-PKC $\epsilon$ , short hairpin RNA-mediated PKC $\epsilon$  knockdown vectors; NS-control, Non-silencing control siRNA.
